# Supplementary material for: Contactless health monitoring in autonomous self-reporting ceramic coatings
Source: Royal Society of Chemistry journal article supplement (doi:10.1039/d4nr03822c), 2025-01-01
Supplement: d4nr03822c1.pdf [file d4nr03822c1.pdf]

# Contactless health monitoring in autonomous self-reporting ceramic coatings

Authors: P. J. Pöllmann, S. Lellig, D. Bogdanovski, A. H. Navidi Kashani, D. M. Holzapfel, C. Azina, P. Schweizer, M. Hans, P. Zöll, D. Primetzhofer, S. Kolozsvári, P. Polcik, J. Michler, J. M. Schneider

## Supplementary Information

S 1: Results of resistance measurements for individual samples in as deposited and annealed state as well as thermal coefficient of resistance (TCR) obtained from cooling curves in the contact-based measurements.

| Annealing temperature [°C] | Resistance contact-based as dep. [Ohm/sq] | Resistance contact-based annealed [Ohm/sq] | Resistance contactless as dep. [Ohm/sq] | Resistance contactless annealed [Ohm/sq] | TCR [1/°C] |
|----------------------------|-------------------------------------------|--------------------------------------------|-----------------------------------------|------------------------------------------|------------|
| 400                        | 3.5                                       | 3.6                                        | 4.7                                     | 4.9                                      | -5.3E-05   |
| 500                        | 3.4                                       | 3.4                                        | 4.9                                     | 4.8                                      | -1.2E-04   |
| 600                        | 3.5                                       | 2.9                                        | 4.8                                     | 4.0                                      | -1.5E-05   |
| 700                        | 3.5                                       | 1.1                                        | 4.8                                     | 1.6                                      | 3.1E-04    |
| 800                        | 3.5                                       | 0.8                                        | 4.8                                     | 1.2                                      | 3.6E-04    |

S 2: Chemical composition determined *ex situ* by ERDA measurements for samples annealed to the indicated temperatures.

| Annealing Temperature [°C] | Composition                                             |
|----------------------------|---------------------------------------------------------|
| As dep.                    | Cr <sub>0.34</sub> Al <sub>0.31</sub> B <sub>0.35</sub> |
| 400                        | Cr <sub>0.37</sub> Al <sub>0.31</sub> B <sub>0.32</sub> |
| 500                        | Cr <sub>0.35</sub> Al <sub>0.31</sub> B <sub>0.34</sub> |
| 600                        | Cr <sub>0.35</sub> Al <sub>0.31</sub> B <sub>0.34</sub> |
| 700                        | Cr <sub>0.36</sub> Al <sub>0.31</sub> B <sub>0.33</sub> |
| 800                        | Cr <sub>0.35</sub> Al <sub>0.30</sub> B <sub>0.35</sub> |

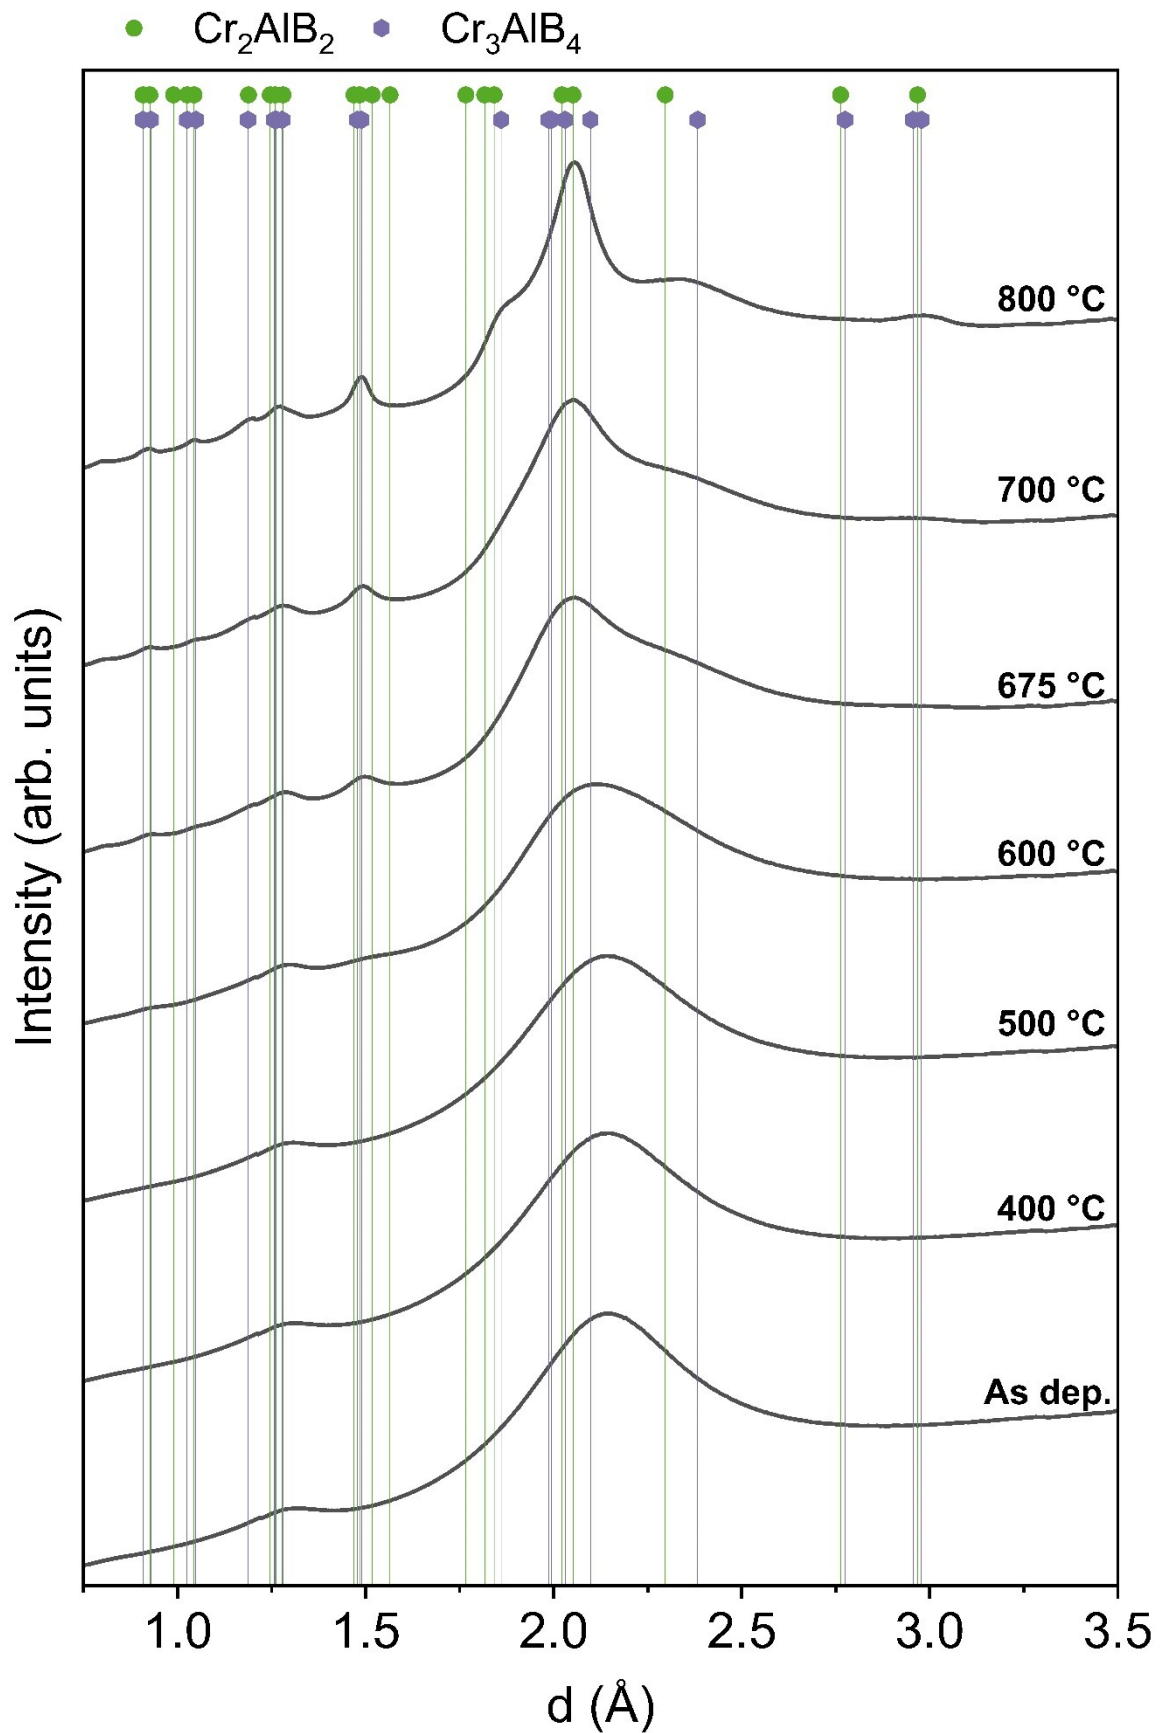

S 3: Integrated SAED patterns for various temperatures extracted during *in situ* annealing with no background subtraction performed. The data were corrected for thermal expansion. Up to 400 °C, no change to the amorphous as deposited state can be seen, while at higher temperatures the formation and grain growth of  $\text{Cr}_2\text{AlB}_2$  and  $\text{Cr}_3\text{AlB}_4$  can be seen.

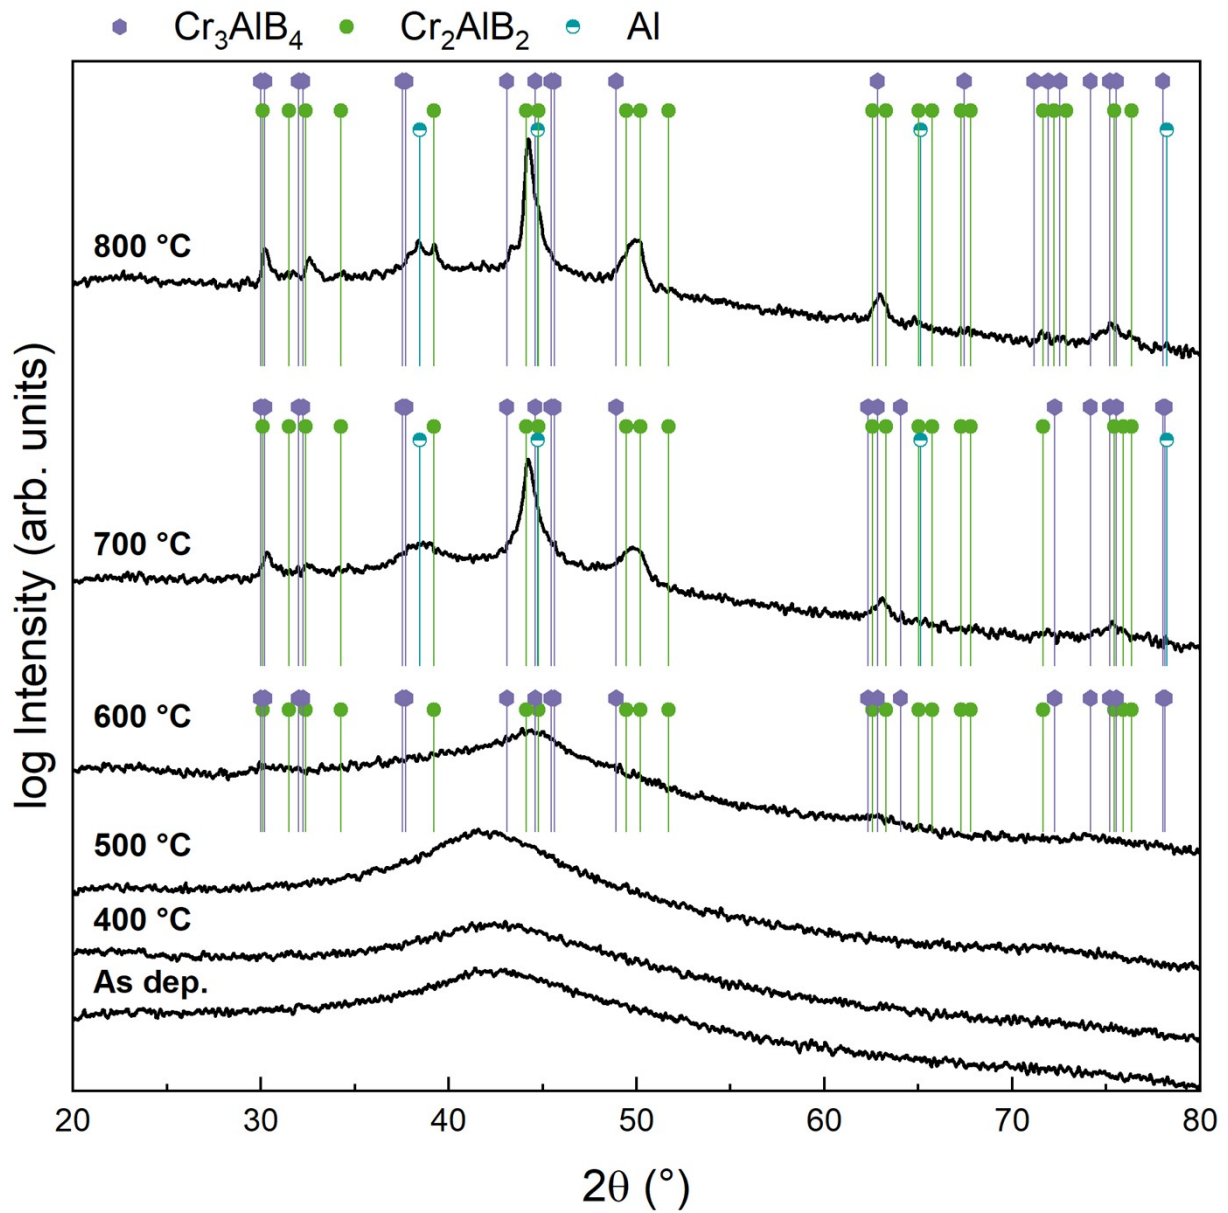

S 4: Full  $2\theta$  range of X-ray diffraction carried out for samples annealed at the indicated temperatures. Formation and growth of MAB phases  $\text{Cr}_2\text{AlB}_2$  and  $\text{Cr}_3\text{AlB}_4$  can be observed.

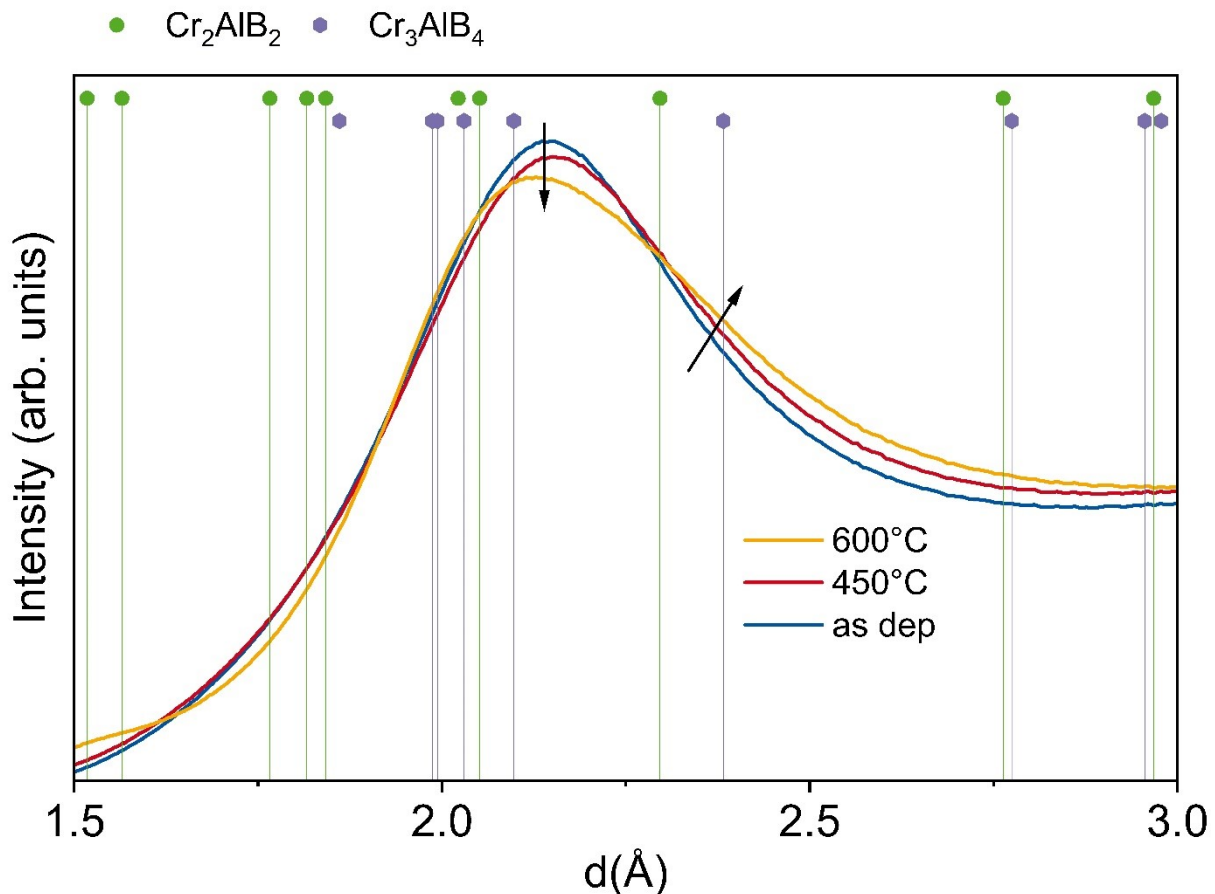

S 5: Comparison of the *in situ* SAED data for the as deposited state and at 450 °C between 1.5 and 3 Å. A shift in the ratio of the intensities below 2.25 Å and above 2.25 Å indicate the formation of a crystalline phase out of the predominantly amorphous matrix.

### **More detailed analysis of phase formation**

To further study phase formation between 450 and 600 °C, longer annealing experiments with holding times of 24 h at 500 °C and 600 °C have been conducted. While SAED data of the sample annealed at 500 °C only reveal the formation of a crystalline Cr-Al-B phase (Figure S 7), the formation of the  $\text{Cr}_2\text{AlB}_2$  MAB phase at this temperature is clearly shown by HRSTEM in Figure S 8a. This can be rationalized by the reported calculated enthalpies of formation predicting  $\text{Cr}_2\text{AlB}_2$  to be energetically favored over  $\text{Cr}_3\text{AlB}_4$ , even though the experimental chemical composition here differs from the theoretically assumed [1]. However, due to the low reported energetic difference (0.044 eV/atom) between both phases, concurrent formation of  $\text{Cr}_3\text{AlB}_4$  cannot be fully ruled out at this temperature.

After annealing at 600 °C, the formation of both  $\text{Cr}_2\text{AlB}_2$  and  $\text{Cr}_3\text{AlB}_4$  can be observed (Figure S 7, Figure S 8b), whereby the observed phase fraction of  $\text{Cr}_2\text{AlB}_2$  is significantly larger compared to  $\text{Cr}_3\text{AlB}_4$ . The higher amount of  $\text{Cr}_2\text{AlB}_2$  correlates with the higher DSC peak intensity of the first transition (orange colored region Figure 2) and with the lower energetic barrier of formation, while the lower fraction of  $\text{Cr}_3\text{AlB}_4$  correlates with the second transition (blue colored region Figure 2) and the slightly higher enthalpy of formation.[1] All of the above indicates that the first transition observed here (orange colored region Figure 2) corresponds to the formation of the  $\text{Cr}_2\text{AlB}_2$  MAB phase, whereas the second transition (blue colored region Figure 2) corresponds to the formation of the  $\text{Cr}_3\text{AlB}_4$  MAB phase while concurrent formation due to structural and energetic similarity cannot be fully ruled out.

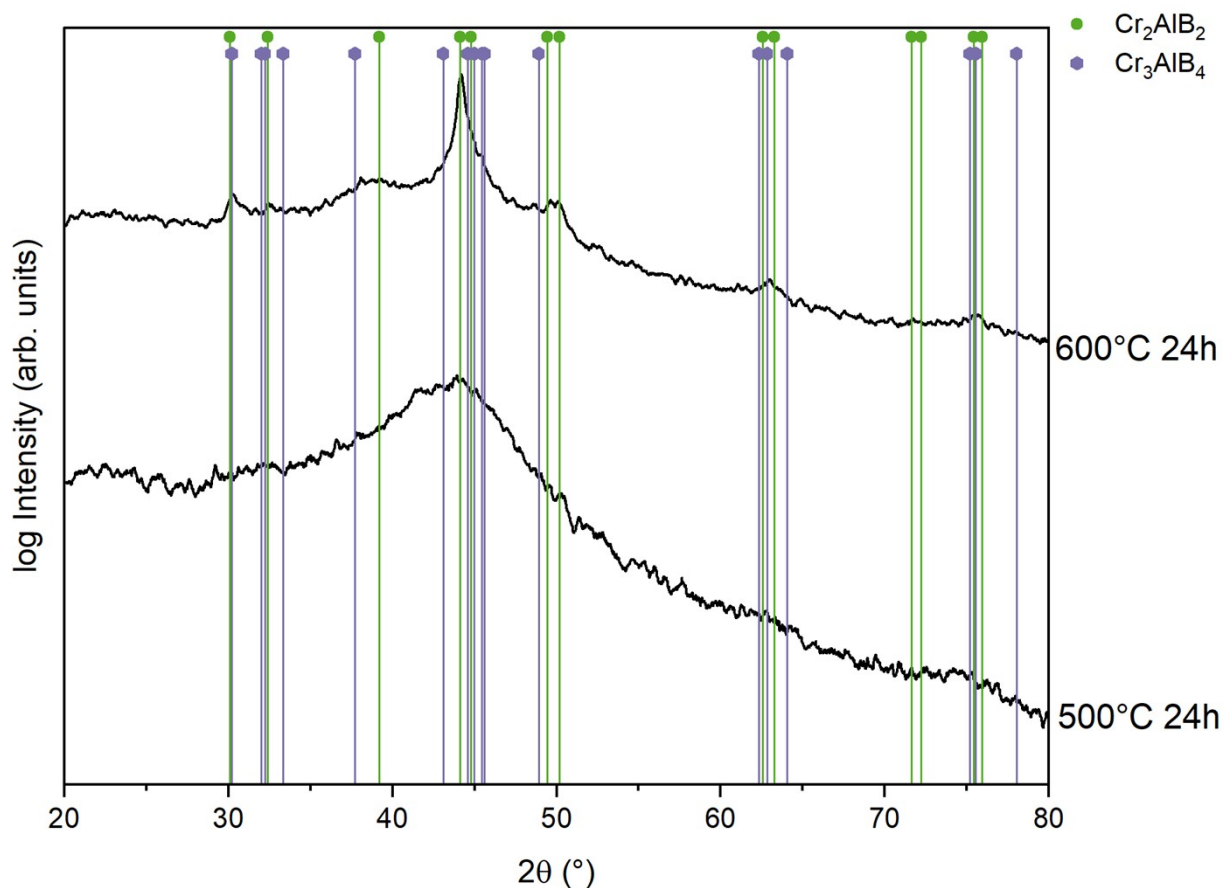

S 6: XRD measured of samples annealed for 24 h at the indicated temperatures to narrow down phase formation. After 600 °C peaks corresponding to  $\text{Cr}_2\text{AlB}_2$  start emerging which cannot be seen at the lower temperature.

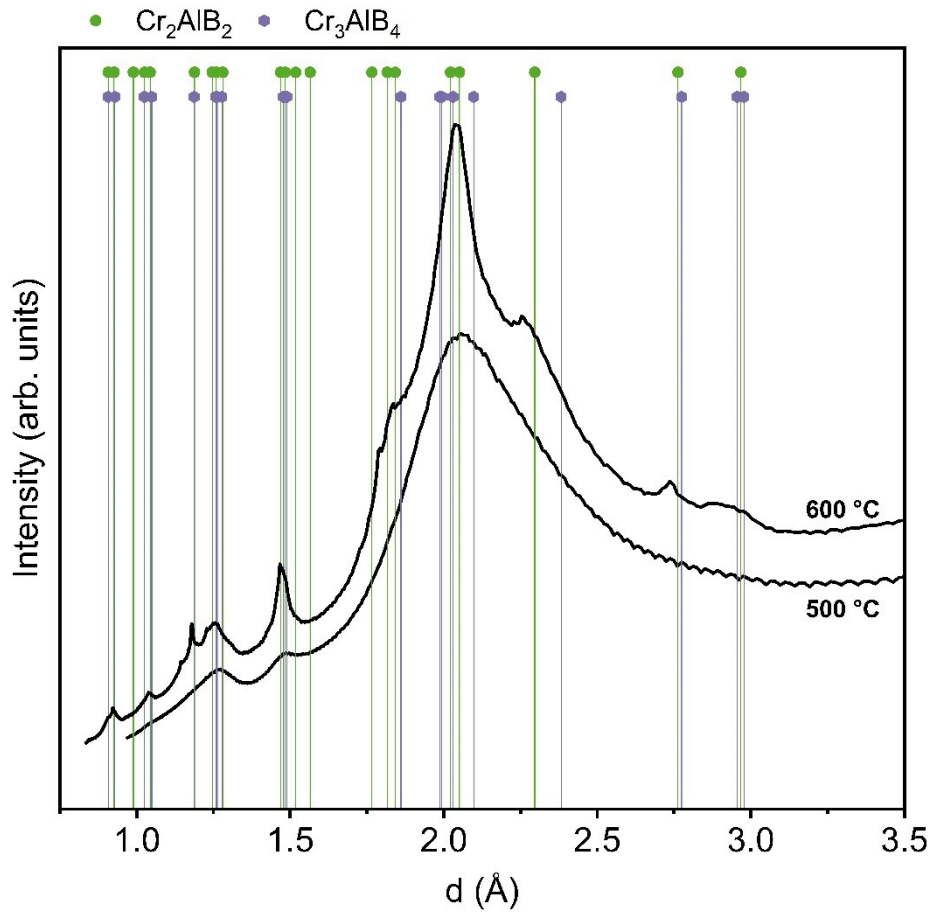

S 7: Integrated intensity of SAED patterns of samples annealed at 500 and 600 °C for 24 h. The formation of a MAB phase is indicated by the presence of three distinct peaks after 500 °C, while the presence of  $\text{Cr}_2\text{AlB}_2$  and  $\text{Cr}_3\text{AlB}_4$  as well as a significant increase in crystallinity and crystal size is visible after annealing at 600 °C.

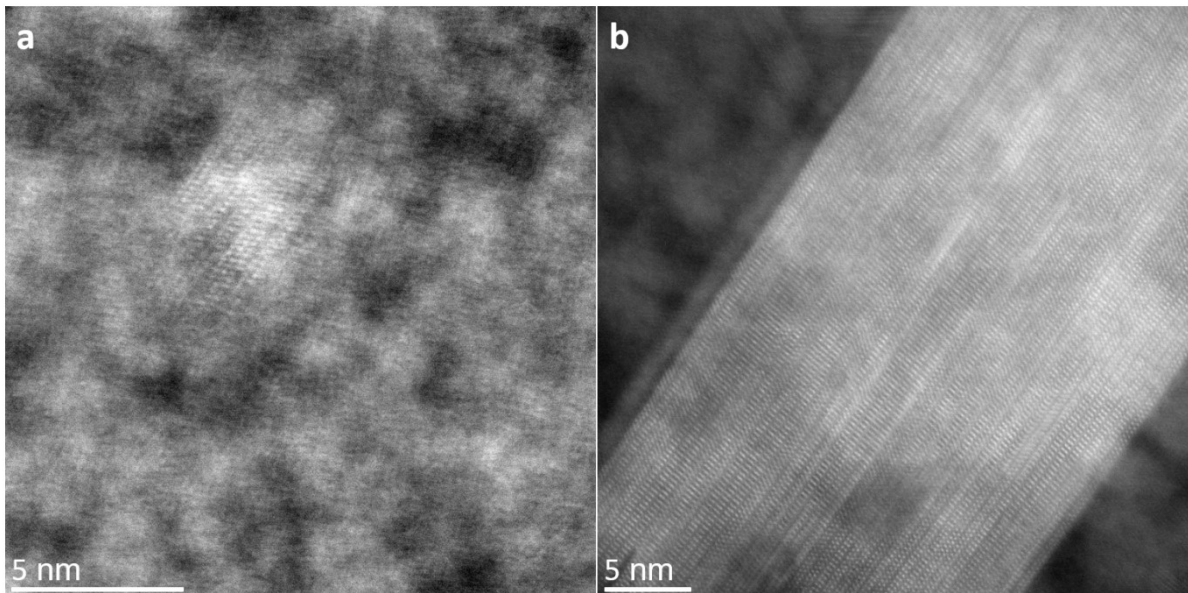

S 8: *Ex situ* HRSTEM micrographs of 24 h annealed samples at 500 °C (a) and 600 °C (b). MAB crystallites containing the  $\text{Cr}_2\text{AlB}_2$  phase are formed after 500 °C. The crystal size is significantly increased after 600 °C, whereby the  $\text{Cr}_2\text{AlB}_2$  as well as the  $\text{Cr}_3\text{AlB}_4$  phase can be identified.

## S 9: Supplementary Video

Available electronically

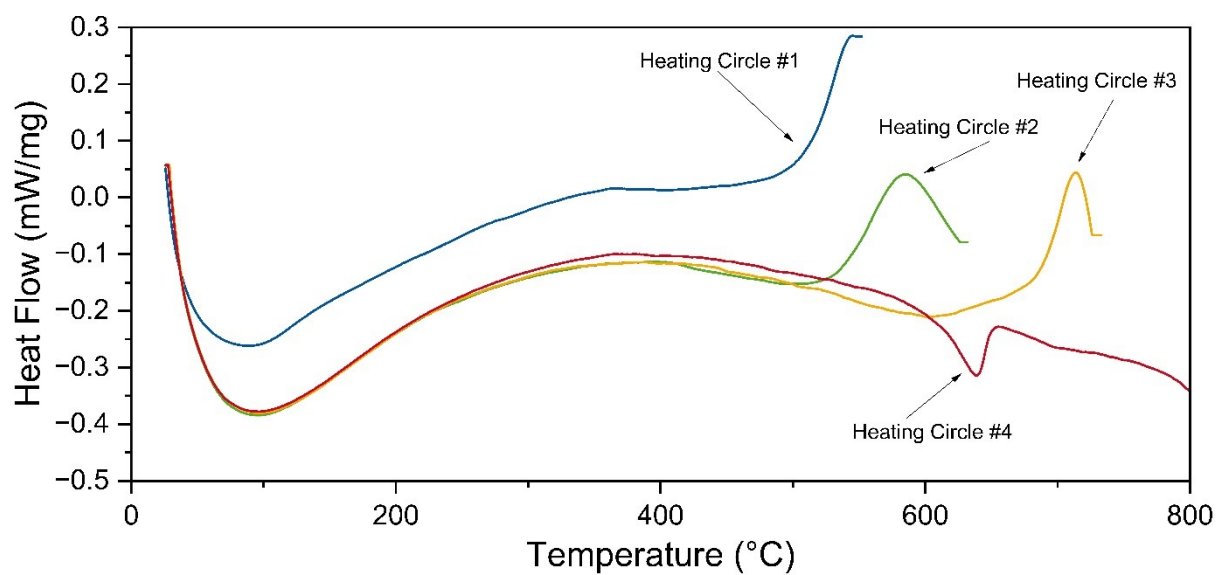

S 10: DSC curves for repeated heating. In addition to the peaks corresponding to exothermic amorphous crystalline transformations (heating cycles 1 to 3), an endothermic peak corresponding to Al melting can be observed in the 4<sup>th</sup> heating cycle (red curve).

## References

1. Khazaei M, Wang J, Estili M, et al. Novel MAB phases and insights into their exfoliation into 2D MBenes [10.1039/C9NR01267B]. *Nanoscale*. 2019;11(23):11305-11314.
